# Supplementary material for: The long non-coding RNA PARTICLE is associated with WWOX and the absence of FRA16D breakage in osteosarcoma patients
Source: PubMed Central journal article supplement (PMC5675644; doi:10.18632/oncotarget.21086), 2017-09-19
Supplement: oncotarget-08-87431-s001.pdf [file oncotarget-08-87431-s001.pdf]

## The long non-coding RNA *PARTICLE* is associated with *WWOX* and the absence of *FRA16D* breakage in osteosarcoma patients

### SUPPLEMENTARY MATERIALS

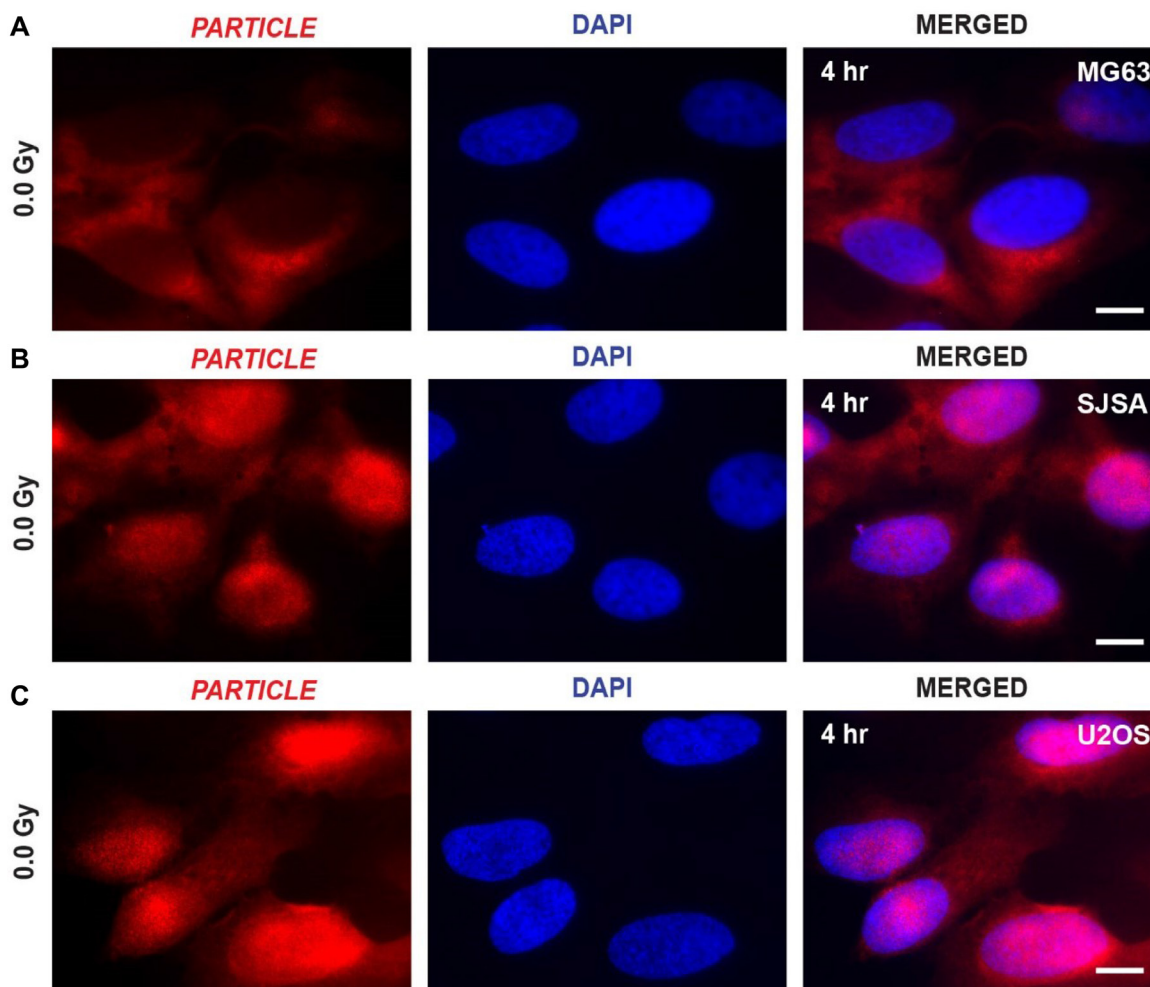

**Supplementary Figure 1: *PARTICLE* expression in osteosarcoma cell lines.** (Related to Figure 2) Representative epifluorescence microscopic images of MG63 (A), SJSA (B), and U2OS (C) labelled with *in situ* hybridization probes (Quasar 570 (red)) specific for *PARTICLE* (left). Nuclei stained with DAPI (blue, middle). Merged images (right). Scale bar 10  $\mu$ m.
